# Supplementary material for: Polymorphism in unusual one-dimensional coordination polymers based on cadmium(ii) and 2-mercaptopyridine N-oxide
Source: Royal Society of Chemistry journal article supplement (doi:10.1039/c3ce40808f), 2013-01-01
Supplement: c3ce40808f.pdf [file c3ce40808f.pdf]

**Electronic Supplementary Information for:**

**Polymorphism in Unusual One-Dimensional Coordination Polymers Based on  
Cadmium(II) and 2-Mercaptopyridine-*N*-Oxide**

Guoqi Zhang

*Department of Science, John Jay College of the City University of New York, New York, NY  
10019, USA. Email: [gqzhang79@gmail.com](mailto:gqzhang79@gmail.com)*

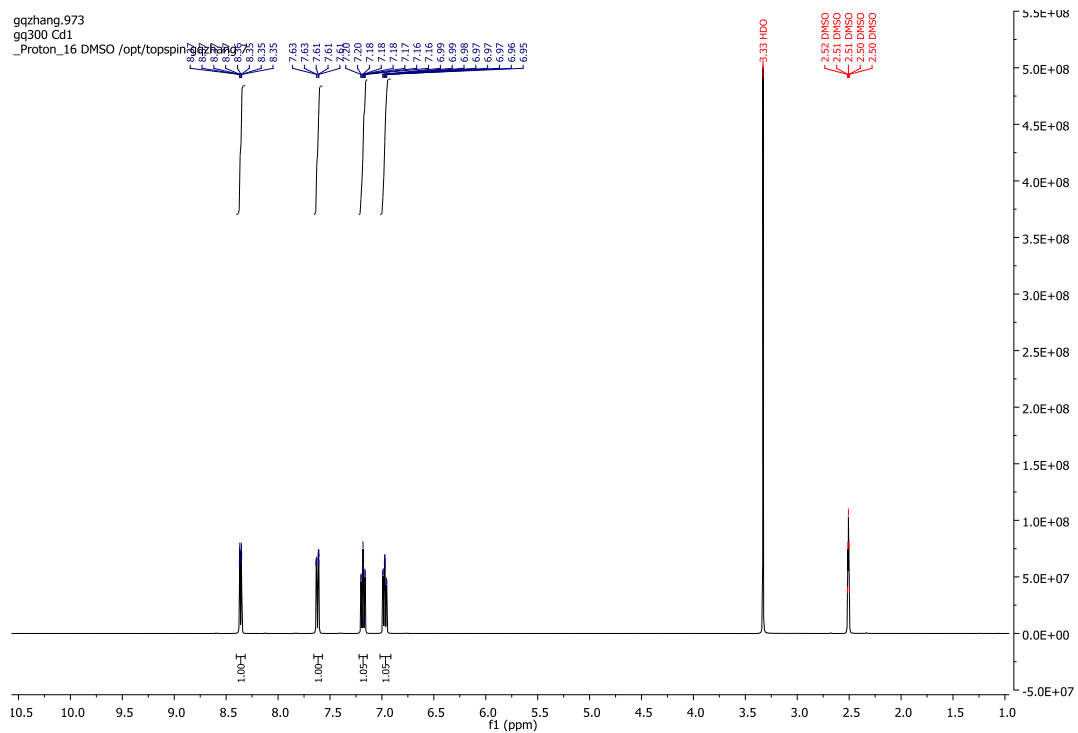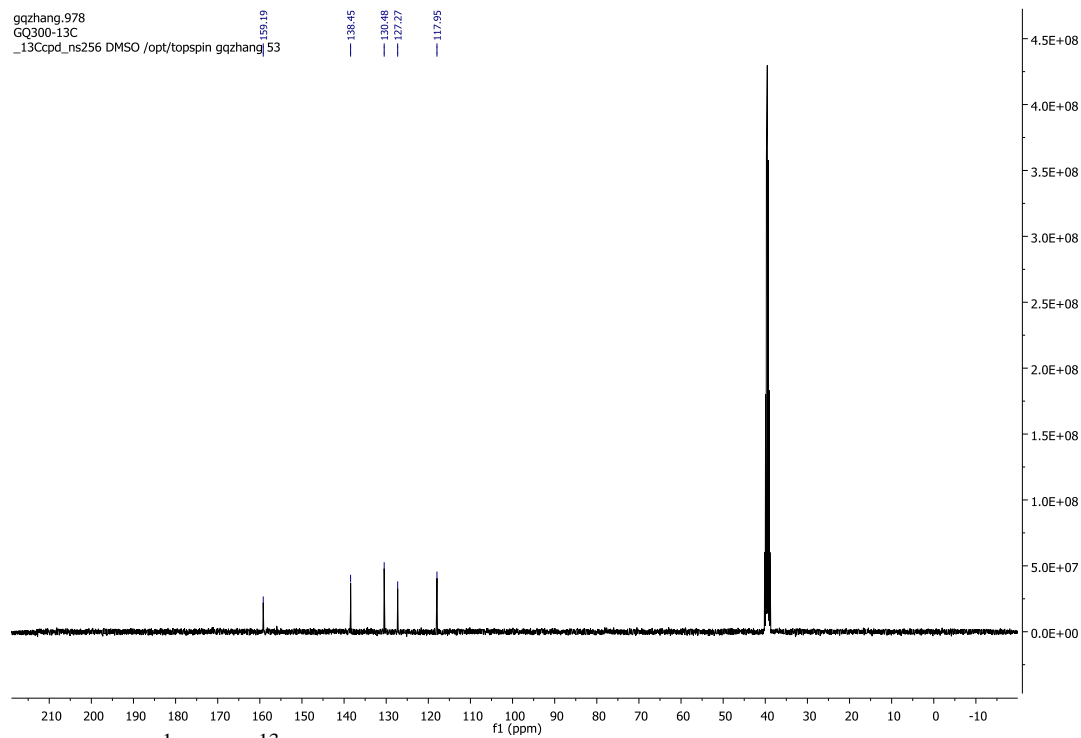

**Figure S1.**  $^1\text{H}$  and  $^{13}\text{C}$  NMR spectra of **1** in  $\text{DMSO-}d_8$ .

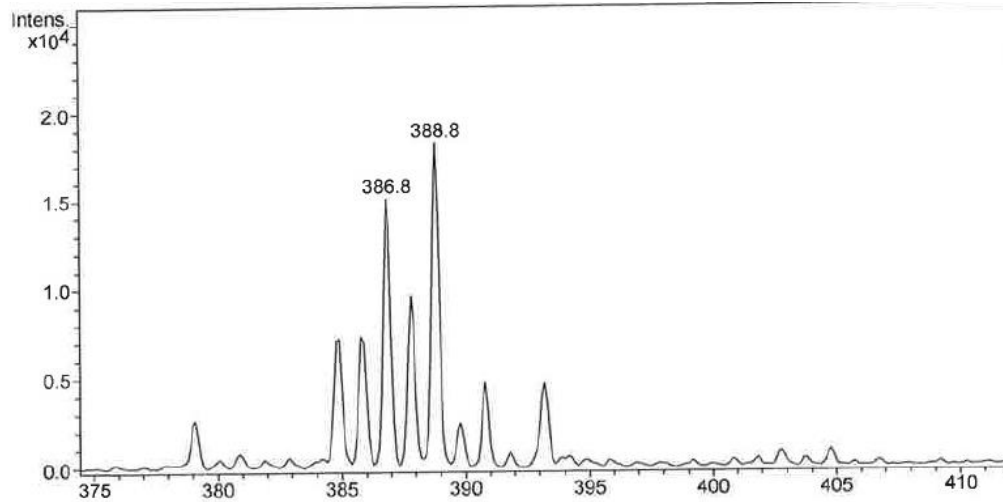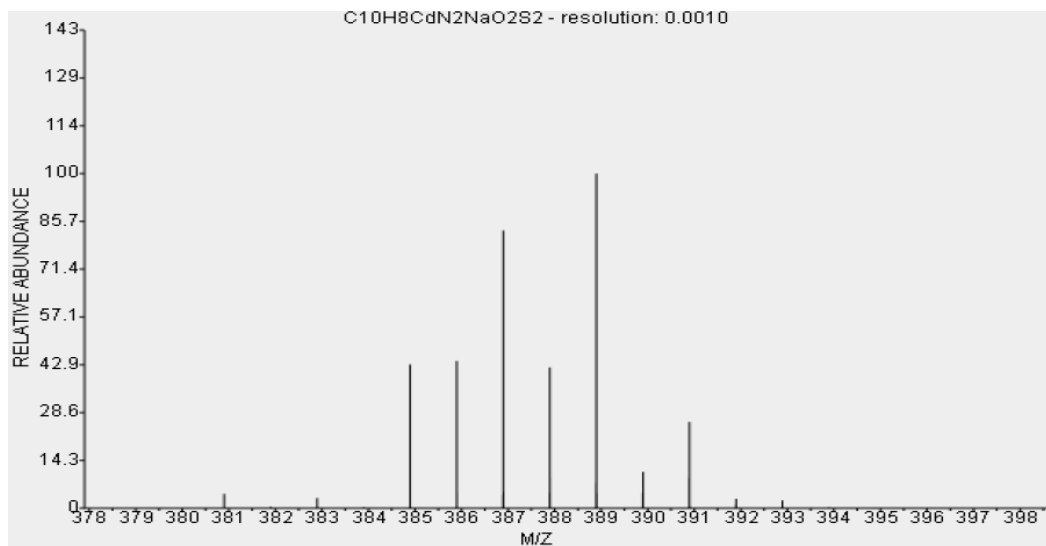

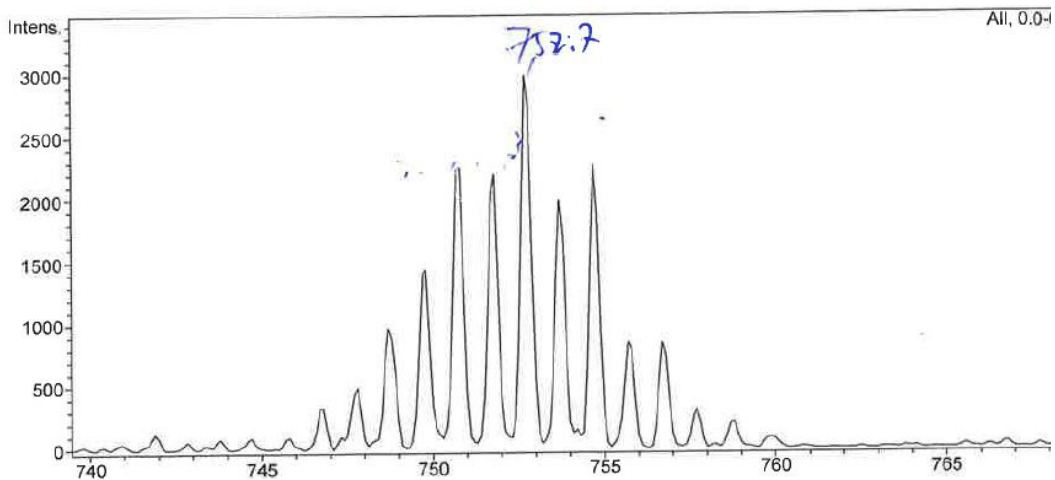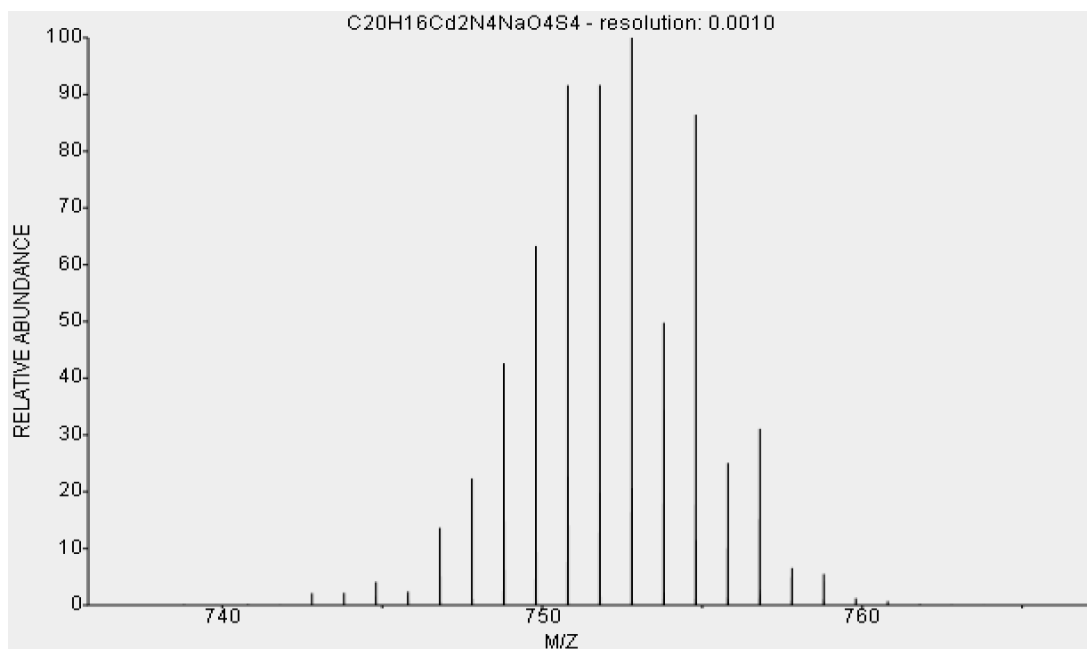

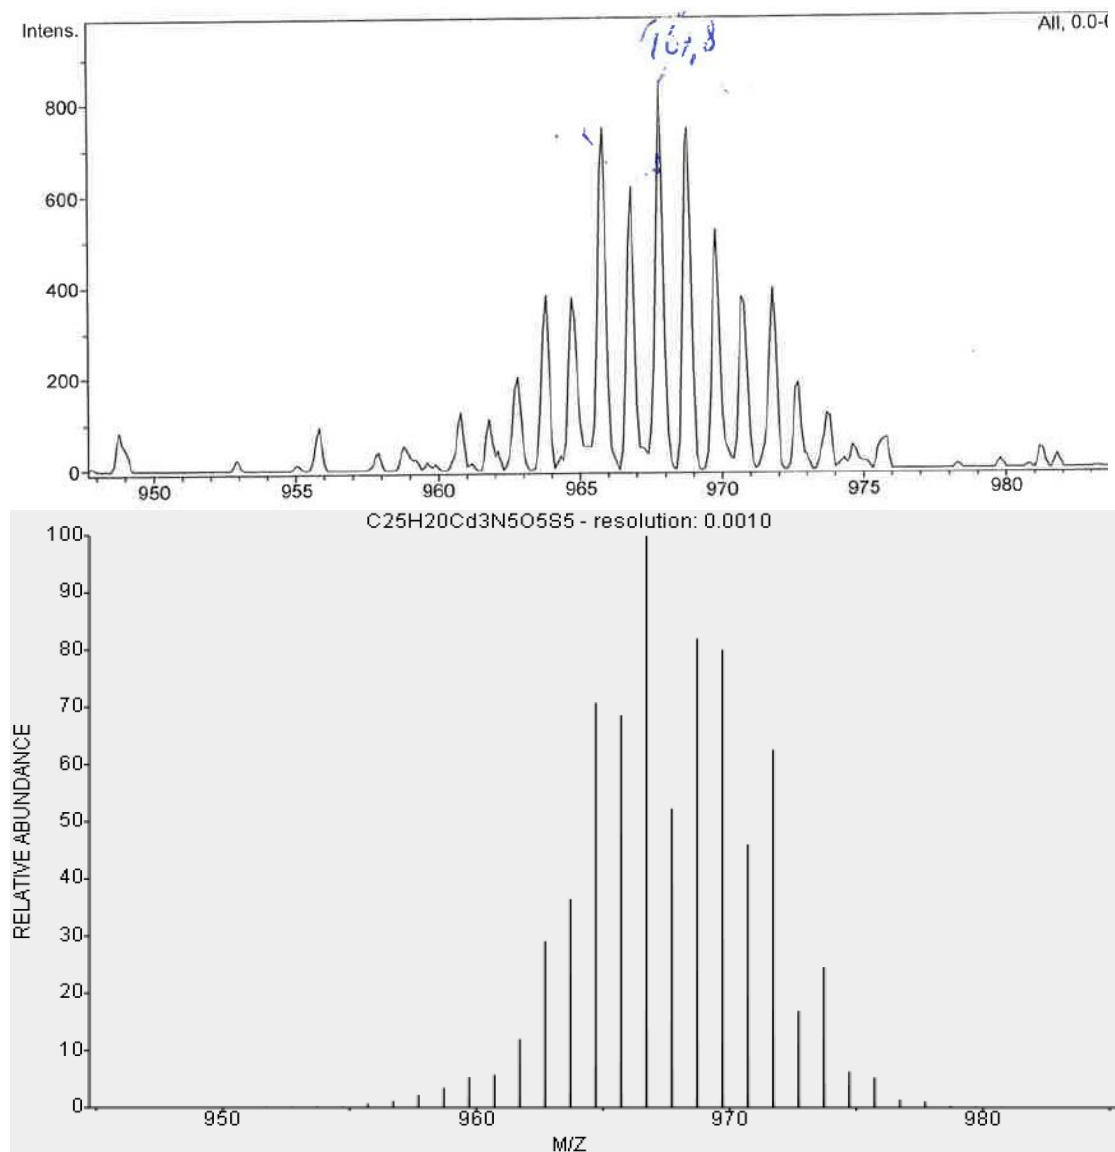

**Figure S2.** Extended isotope distribution (experimental and simulated) of peaks at  $m/z$ : 389.0  $[\text{Cd}(\text{L})_2\text{Na}]^+$ , 752.7  $[\text{Cd}_2(\text{L})_4 + \text{Na}]^+$  and 967.8  $[\text{Cd}_3(\text{L})_5]^+$  from the ESI-MS spectrum of **1**.

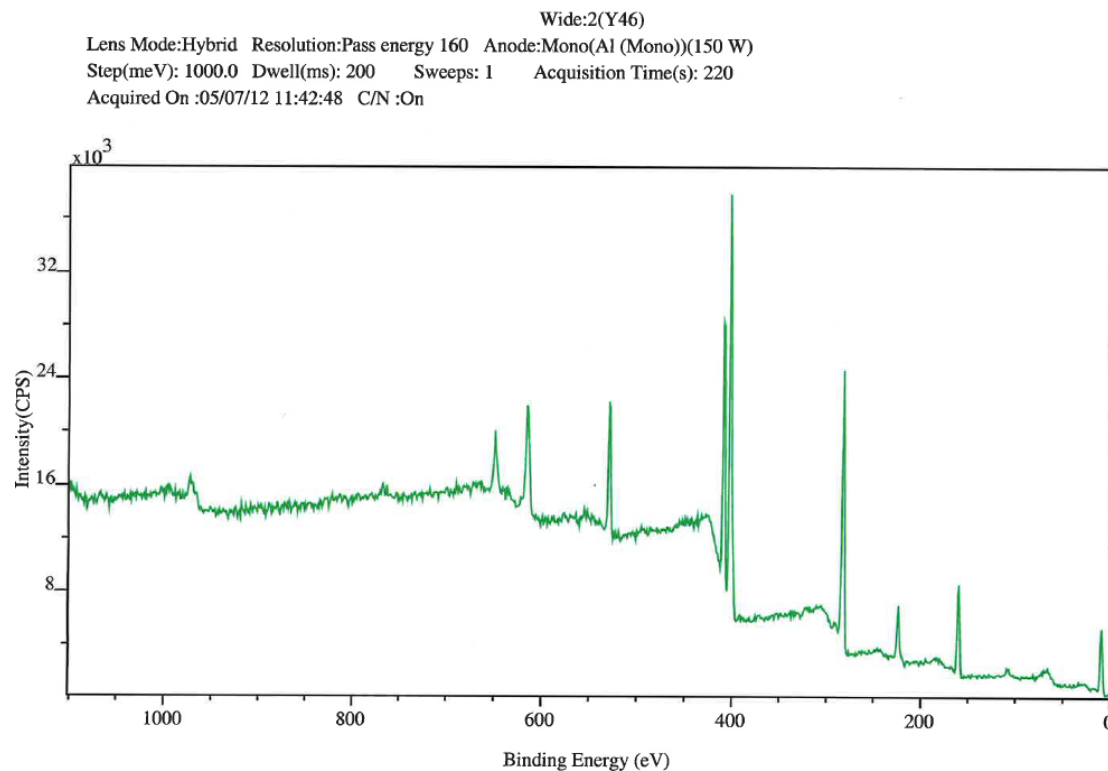

**Figure S3.** X-ray photoelectron spectroscopy (XPS) of **1**.

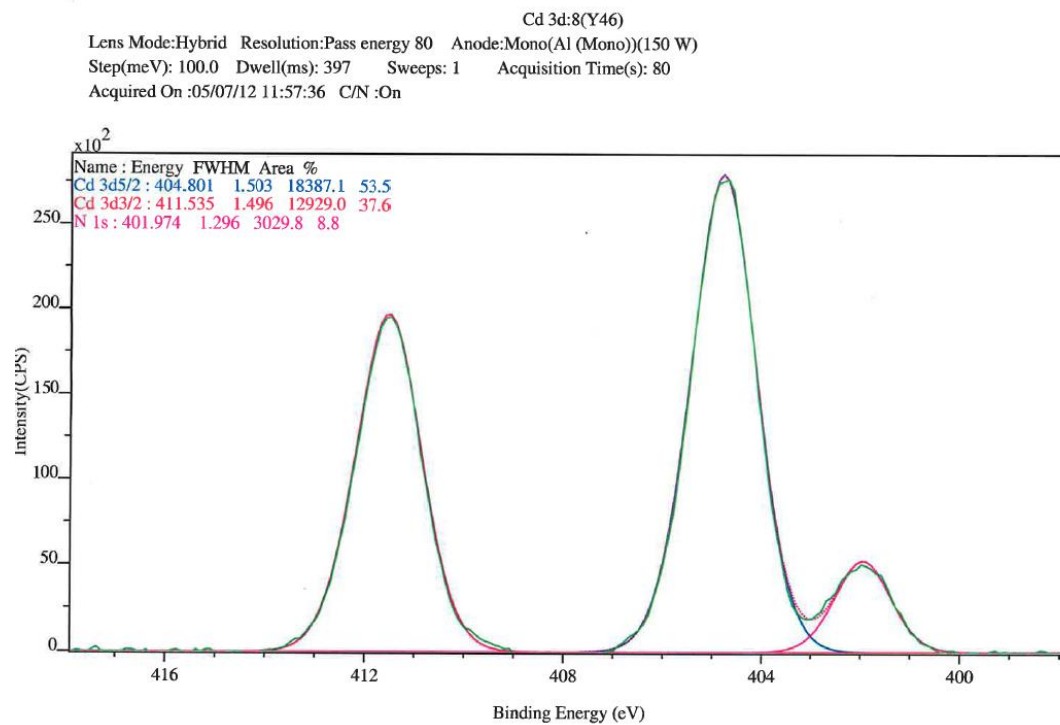

**Figure S4.** Extended XPS profile for Cd in **1**.
